# Supplementary material for: Double-headed nucleotides as xeno nucleic acids: information storage and polymerase recognition
Source: Royal Society of Chemistry journal article supplement (doi:10.1039/d0ob01426e), 2020-01-01

## Electronic Supplementary Information

### Double-headed nucleotides as xeno nucleic acids: information storage and polymerase recognition

*Kasper M. Beck,<sup>a</sup> Marie B. Krogh,<sup>a</sup> Mick Hornum,<sup>a</sup> Paul T. Ludford, III,<sup>b</sup> Yitzhak Tor<sup>b</sup> and Poul Nielsen<sup>a\*</sup>*

a. Department of Physics, Chemistry and Pharmacy, University of Southern Denmark, Campusvej 55, DK-5230, Odense, Denmark.

b. Department of Chemistry and Biochemistry, University of California, San Diego, 9500 Gilman Drive, La Jolla, CA 92093-0358, USA.

pouln@sdu.dk

#### List of Contents:

|                                                                      |        |
|----------------------------------------------------------------------|--------|
| Circular dichroism spectroscopy                                      | S2     |
| MALDI-TOF MS data for synthesized oligonucleotides                   | S2     |
| PAGE for primer extension experiments with Terminator DNA polymerase | S3     |
| Selected NMR spectra for compounds <b>2–6</b> and <b>8</b>           | S4–S18 |

### Circular dichroism spectroscopy

CD spectra were recorded at 20 °C on a Jasco J-715 spectropolarimeter as an average of 5 scans from 200–350 nm. Measurements were performed using a split width of 2.0 nm, a scan speed of 50 nm pr. min and in quartz optical cells with an optical path length of 5.0 mm. The samples contained 1.5  $\mu$ M concentrations of each strand in a medium salt buffer (2.5 mM Na<sub>2</sub>HPO<sub>4</sub>, 5 mM NaH<sub>2</sub>PO<sub>4</sub>, 100 mM NaCl, and 0.1 mM EDTA, pH 7.0) and before the measuring, the oligonucleotides were annealed by heating the samples to 75 °C followed by controlled cooling.

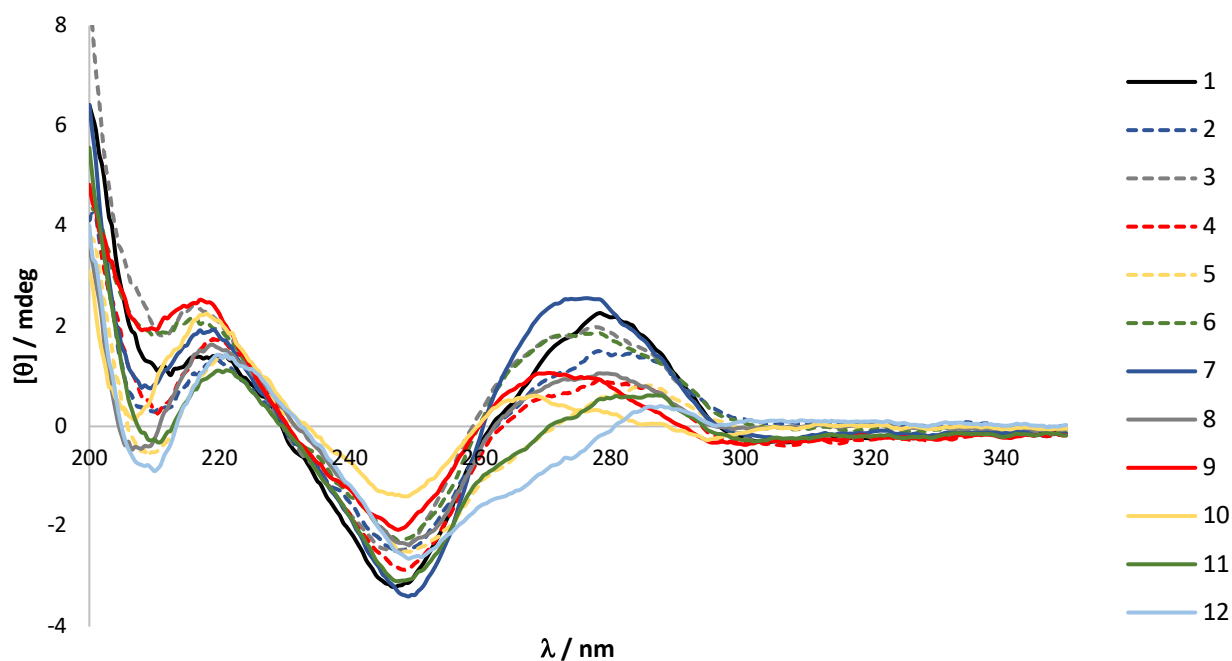

**Fig. S1** CD spectra for duplexes 1-12 (entry numbers refer to Fig. 2).

### MALDI-TOF MS data for synthesized oligonucleotides

**Table S1:** MALDI-TOF MS data for synthesized oligonucleotides.

| # | Sequence                                                 | MW (calcd) | MW (found) |
|---|----------------------------------------------------------|------------|------------|
| 1 | 5'-d(GGTCA A <sub>T</sub> ATGCGA)-3'                     | 3848.6     | 3848.4     |
| 2 | 5'-d(GGTCA A <sub>T</sub> A <sub>T</sub> GCGA)-3'        | 3698.4     | 3698.6     |
| 3 | 5'-d(TCGCA U <sub>A</sub> TTGACC)-3'                     | 3745.5     | 3746.8     |
| 4 | 5'-d(TCGCAT A <sub>T</sub> TGACC)-3'                     | 3759.5     | 3760.4     |
| 5 | 5'-d(TCGCA U <sub>A</sub> U <sub>T</sub> GACC)-3'        | 3581.4     | 3581.5     |
| 6 | 5'-d(TCG CTG U <sub>A</sub> GT AAC CGG TCT TCG CGC G)-3' | 7790.1     | 7794.7     |

## PAGE for primer extension experiments with Therminator DNA polymerase

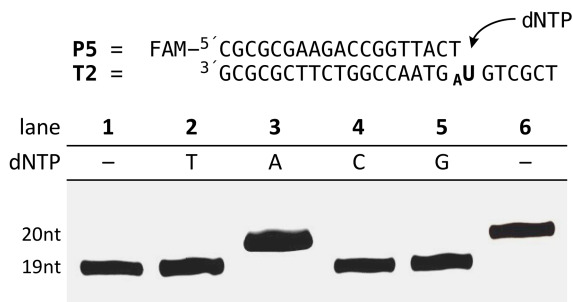

**Fig. S2** PAGE analysis of a single nucleotide incorporation study with natural dNTPs and primer **P5** in the presence of template **T2** and Therminator. Lane 1 corresponds to the negative control and lane 6 corresponds to the 20 nt synthetic control **P6**. Conditions: [**P5**] = 0.1  $\mu$ M; [**T2**] = 0.1  $\mu$ M; [dNTP] = 40  $\mu$ M; [Therminator] = 0.02 U/ $\mu$ L; temperature = 75  $^{\circ}$ C; reaction time = 10 min.

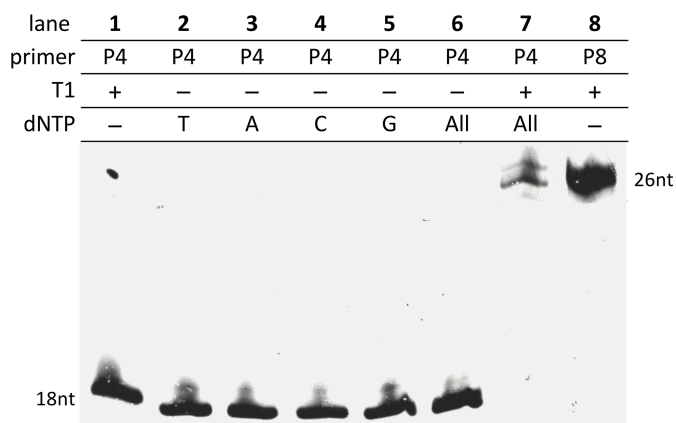

**Fig. S3** PAGE analysis of template-free negative controls with natural dNTPs, primer **P4** and Therminator. Lane 1 and 8 correspond to the dNTP-free negative control with primer **P4** and **P8**, respectively. Lane 7 corresponds to positive control. Conditions: [primer] = 0.1  $\mu$ M; [**T1**] = 0.1  $\mu$ M; [dNTP] = 40  $\mu$ M; [Therminator] = 0.02 U/ $\mu$ L; temperature = 75  $^{\circ}$ C; reaction time = 15 min.

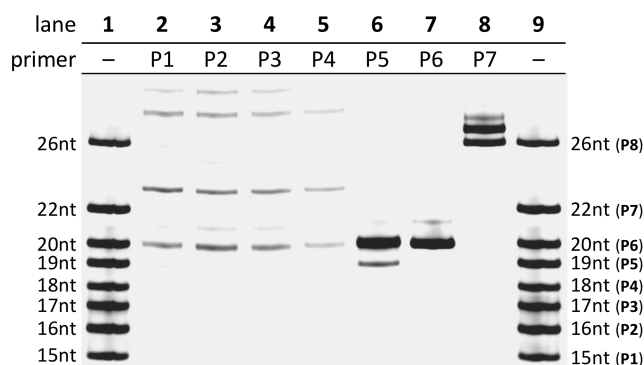

**Fig. S4** PAGE analysis of full-length extension reactions with the primers **P1-P7** in the presence of **T2** and Therminator. Both lane 1 and 9 corresponds to the synthetic primers **P1-P7** and the 26 nt synthetic control **P8**. Conditions: [primer] = 0.1  $\mu$ M; [**T2**] = 0.1  $\mu$ M; [dNTP] = 200  $\mu$ M; [Therminator] = 0.02 U/ $\mu$ L; temperature = 75  $^{\circ}$ C; reaction time = 60 min.

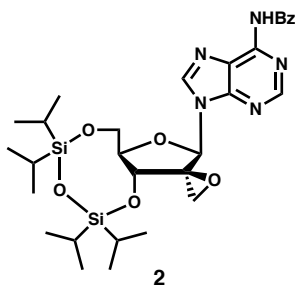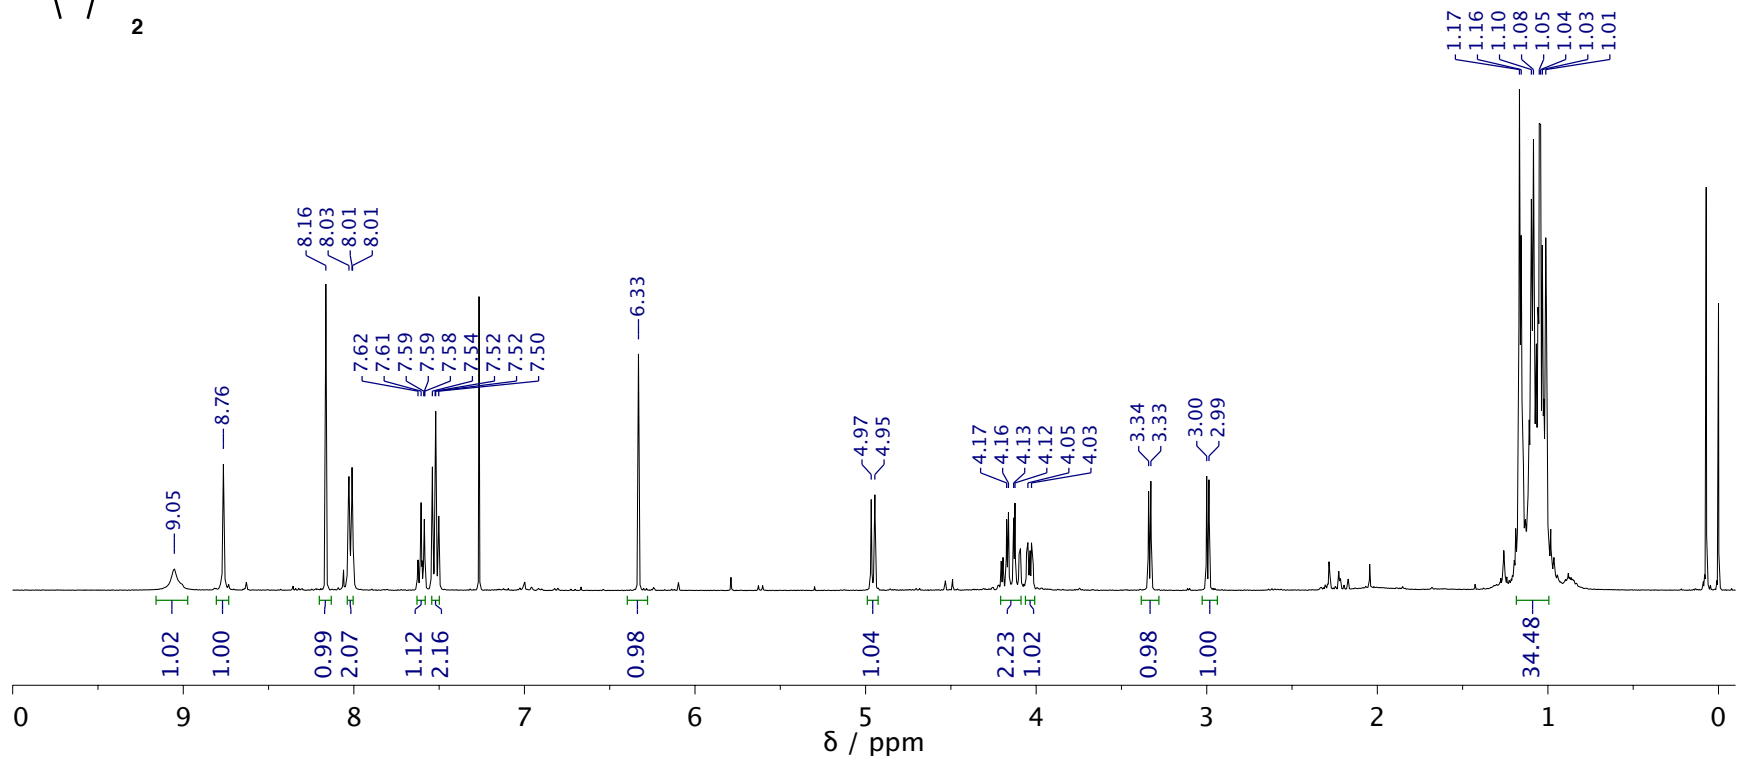

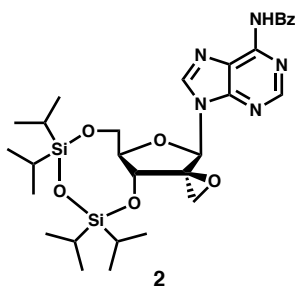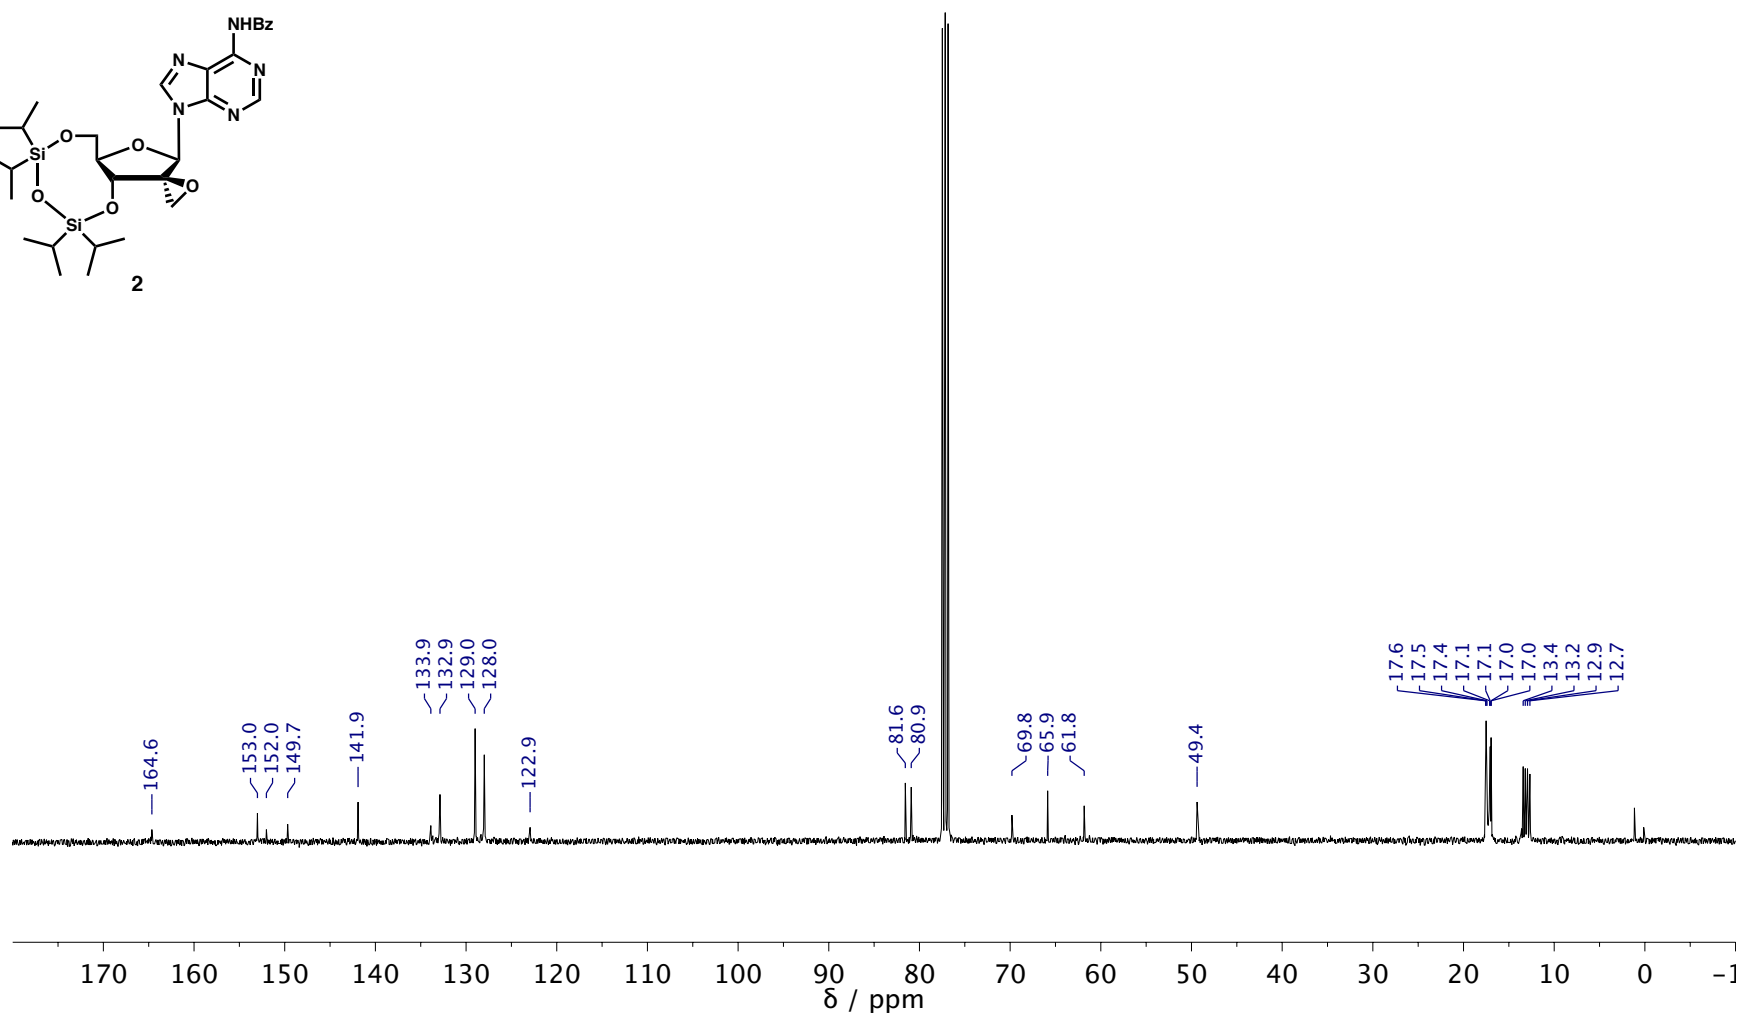

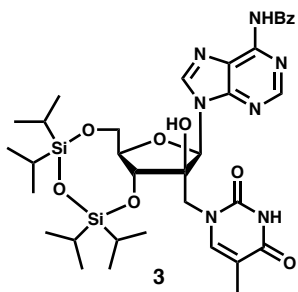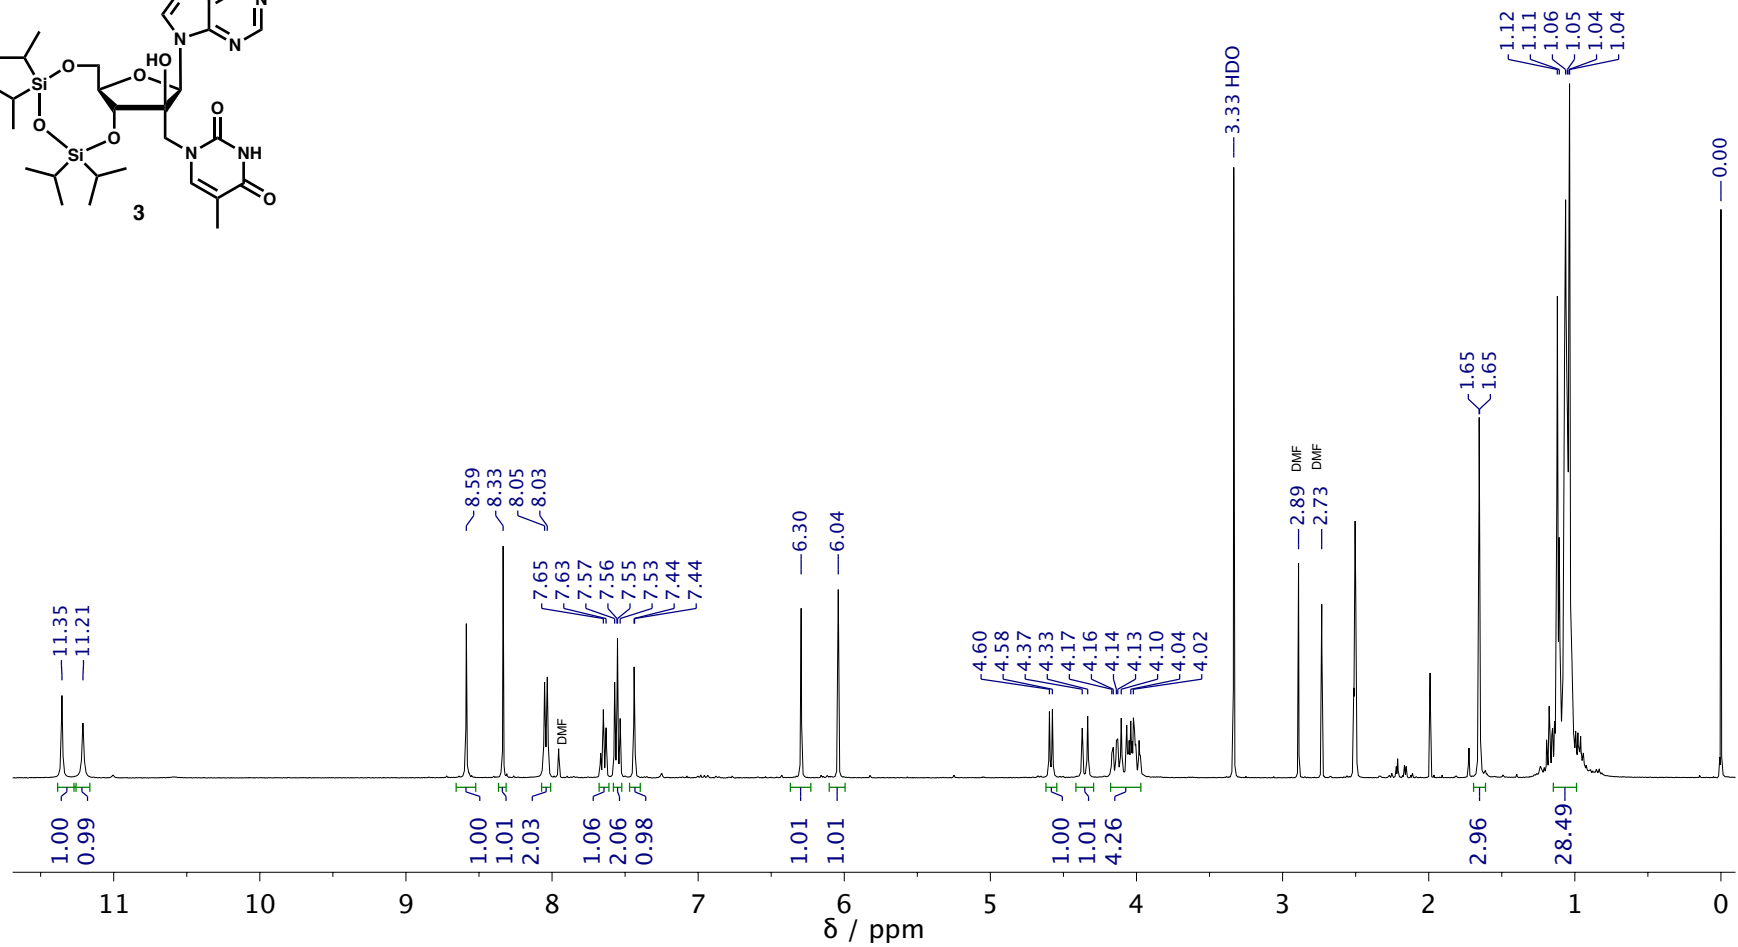

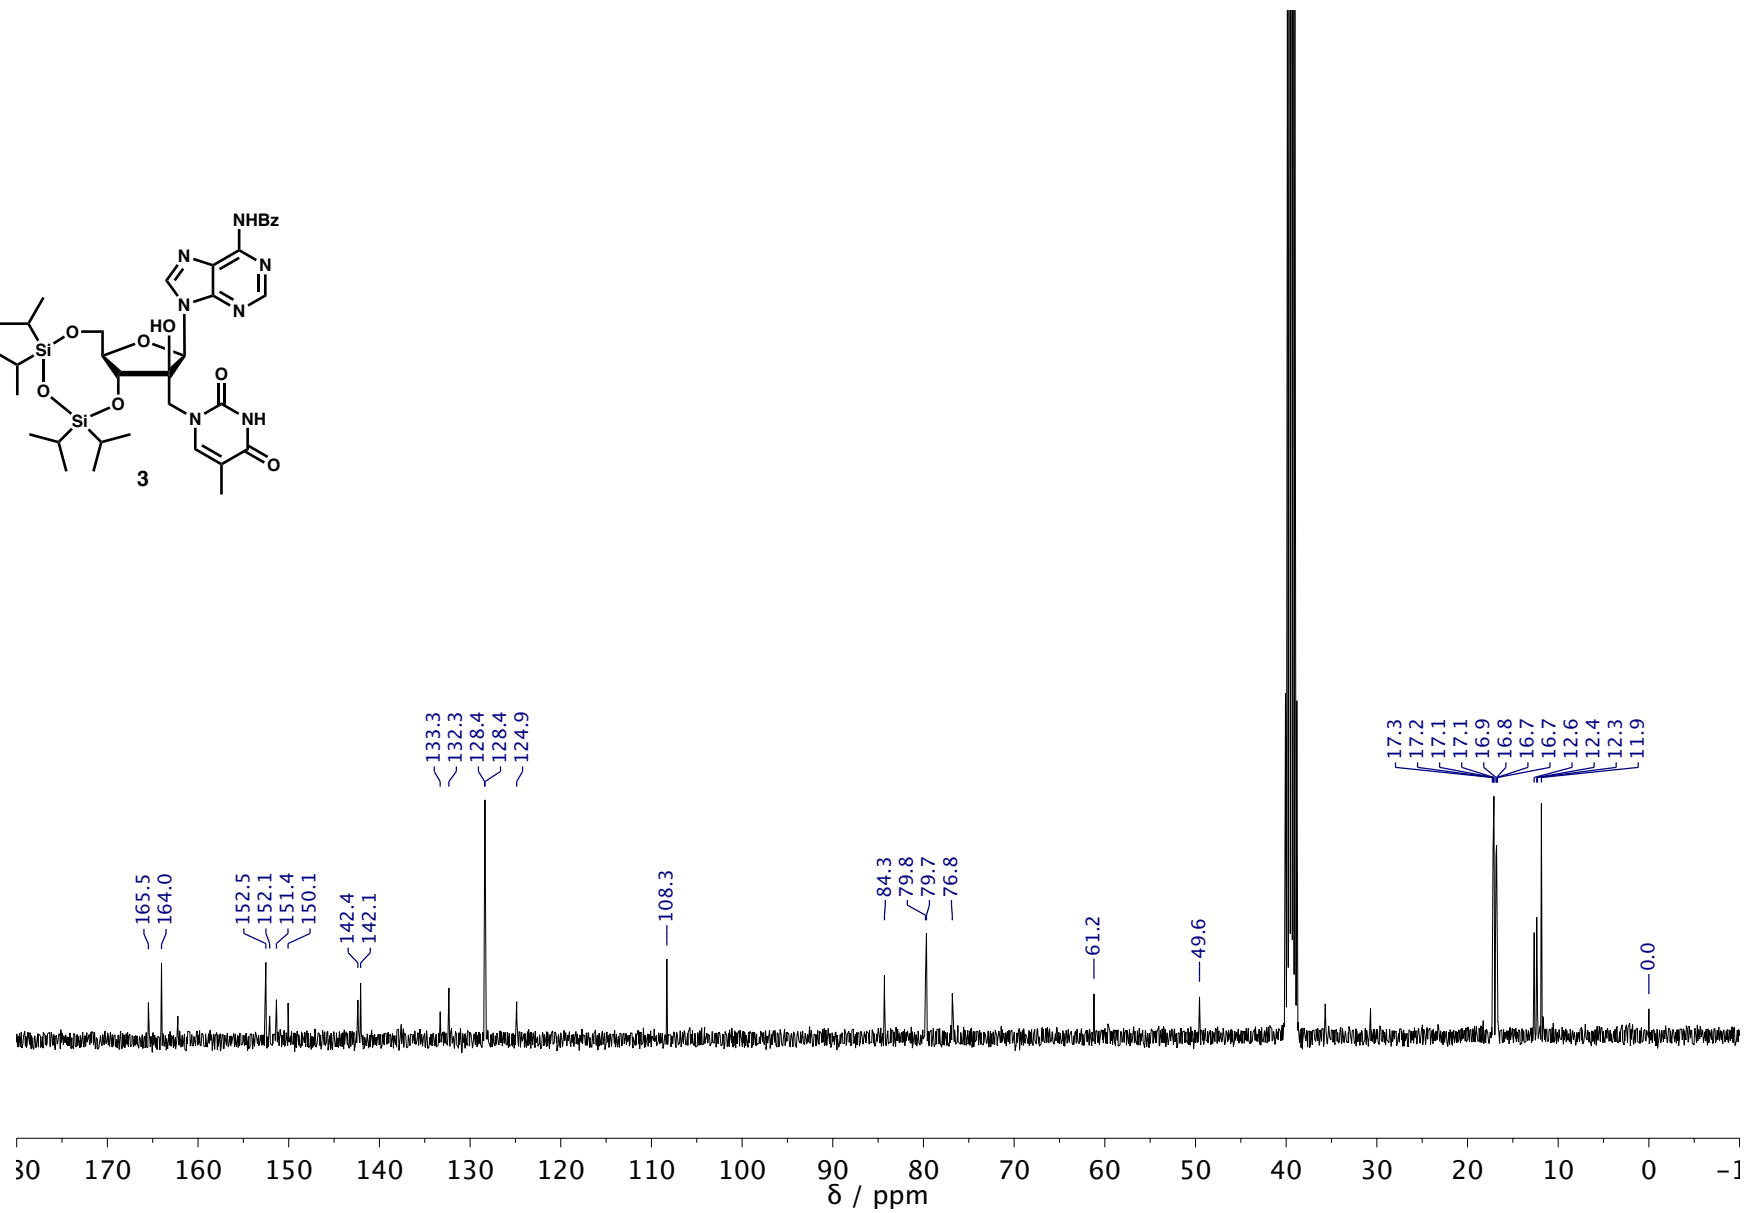

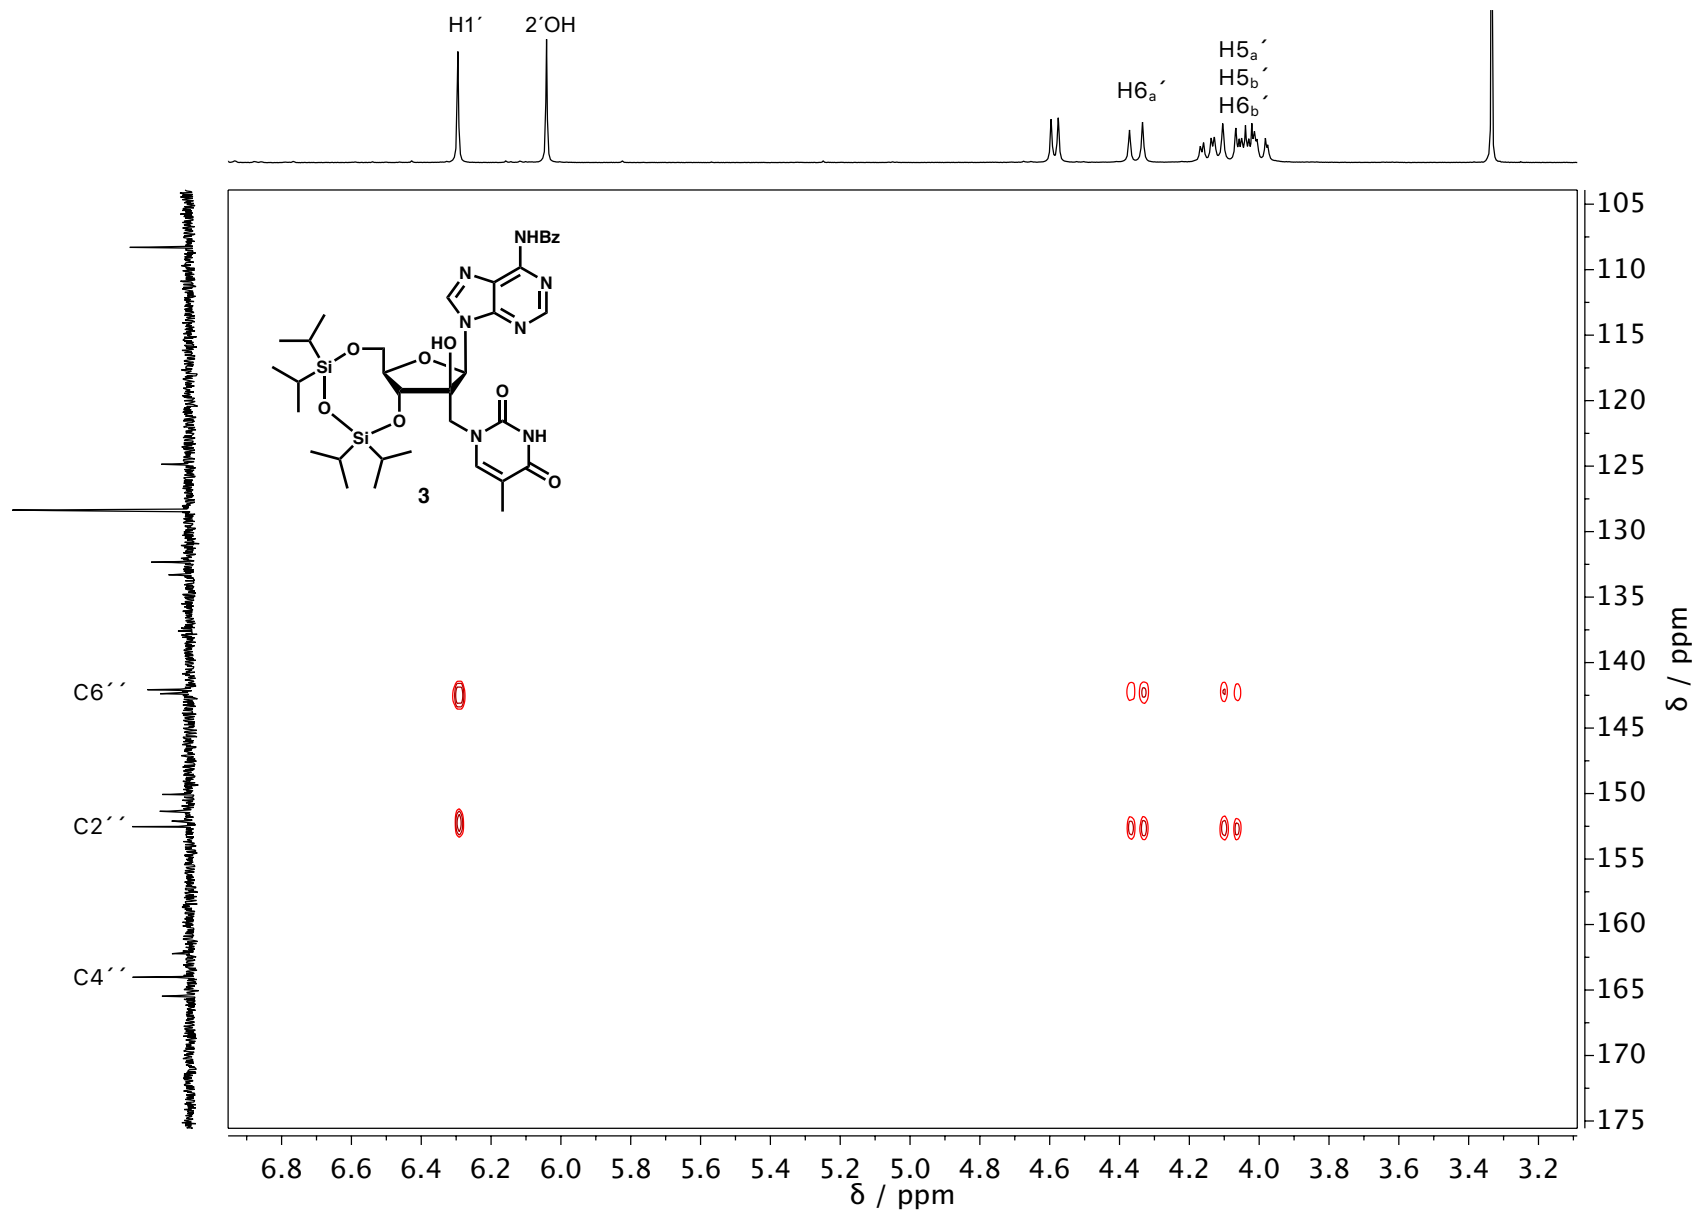



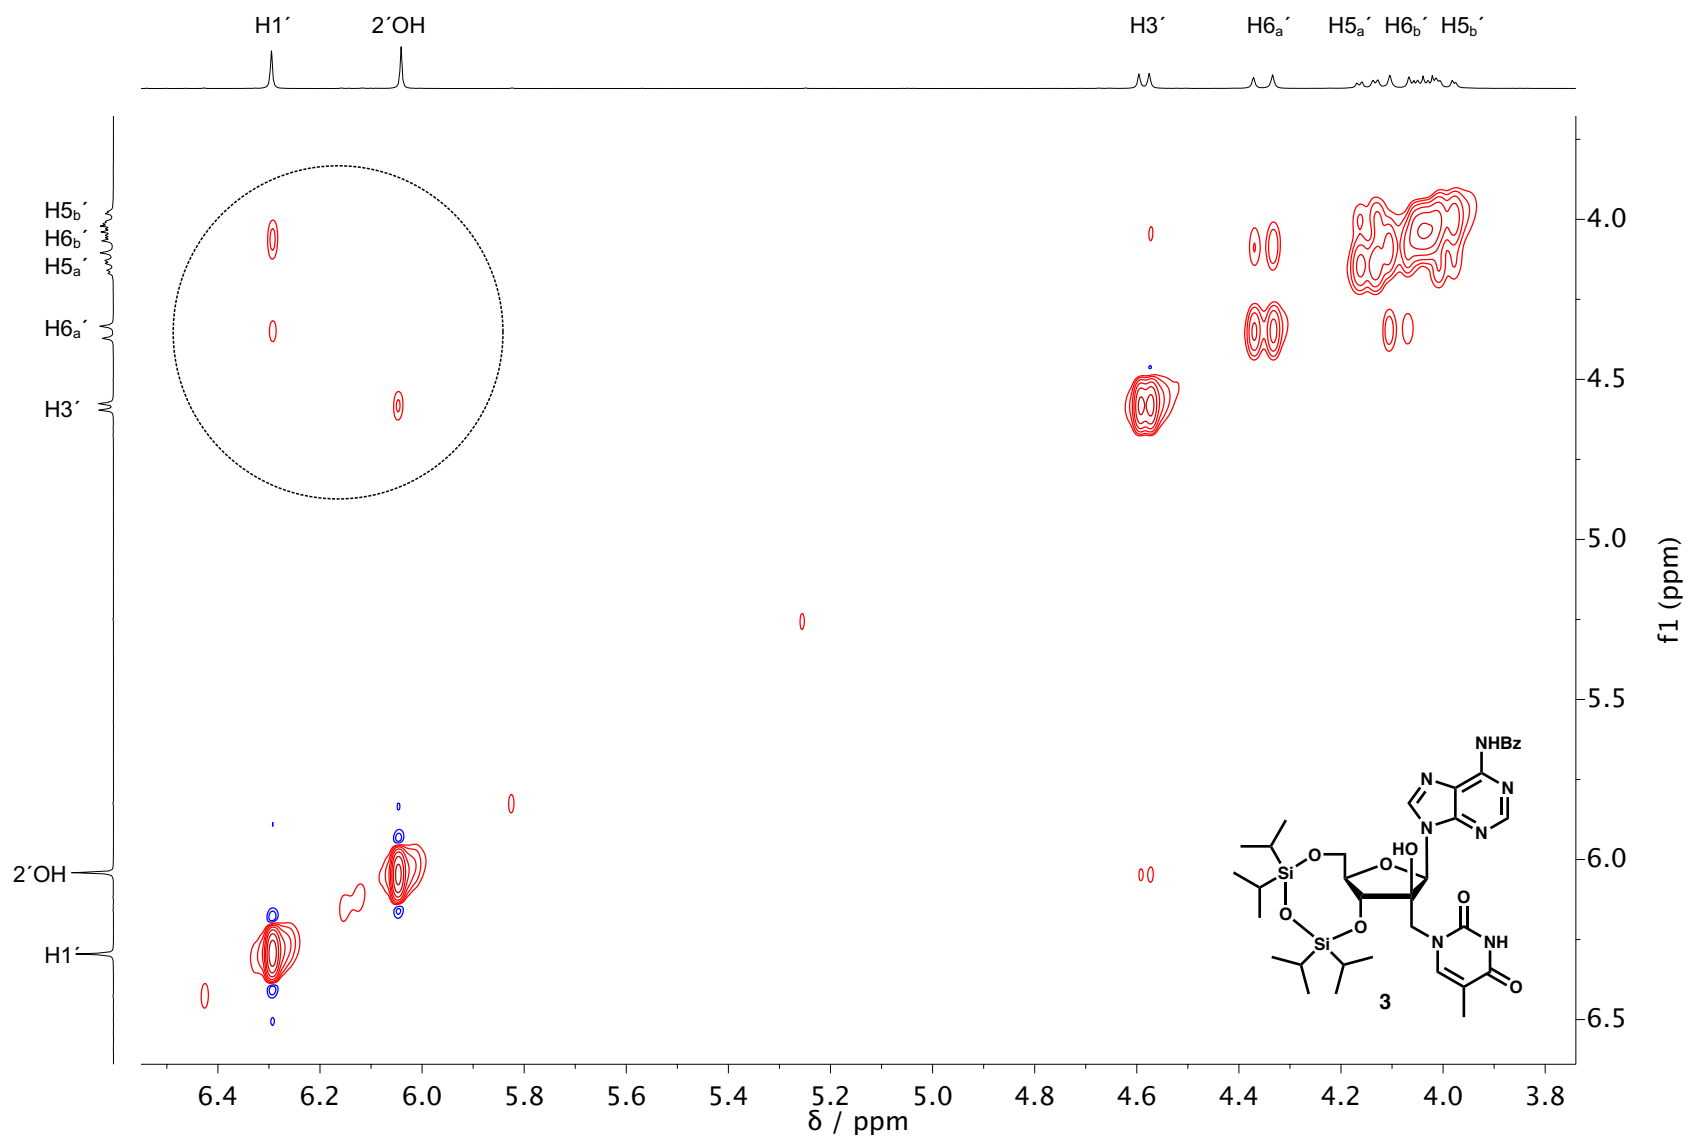

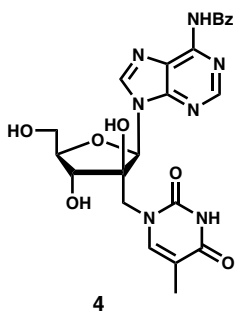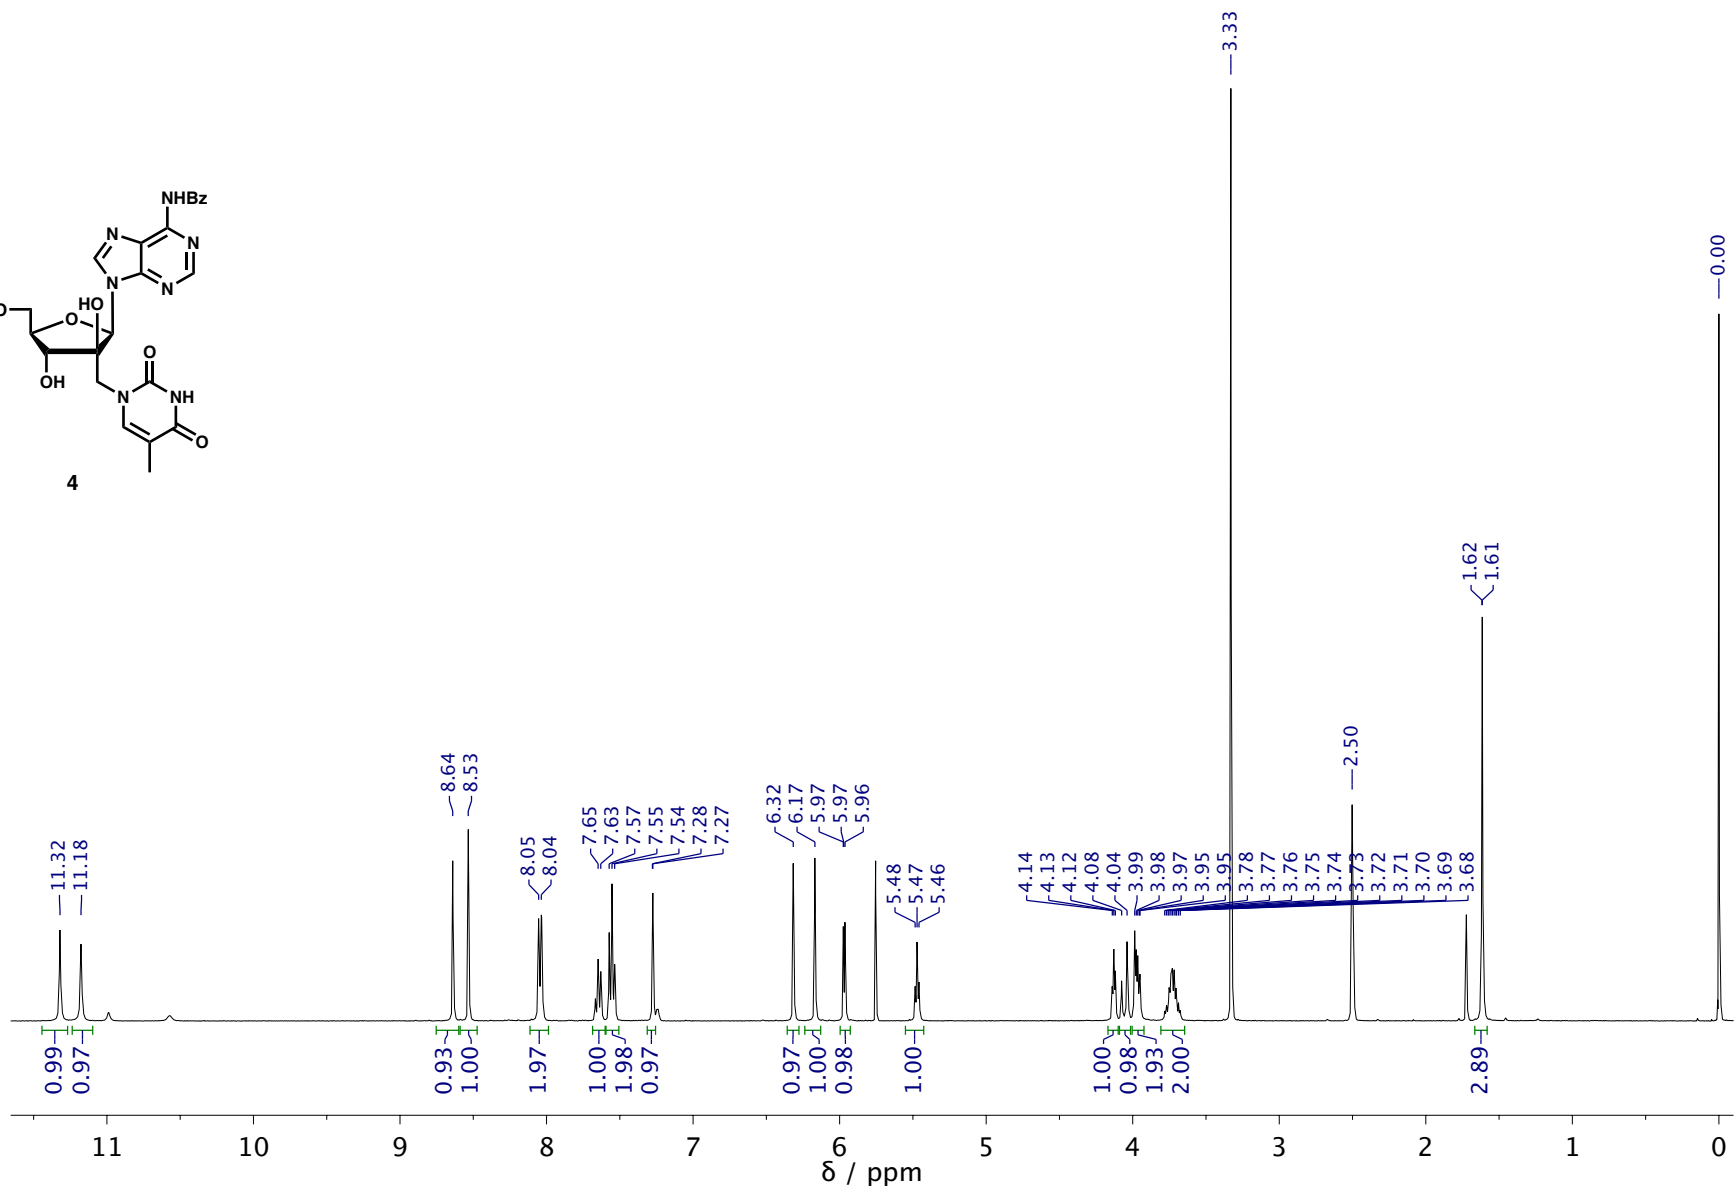

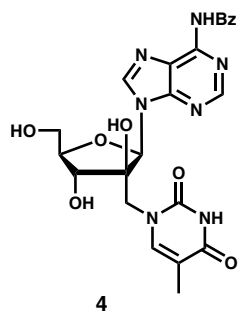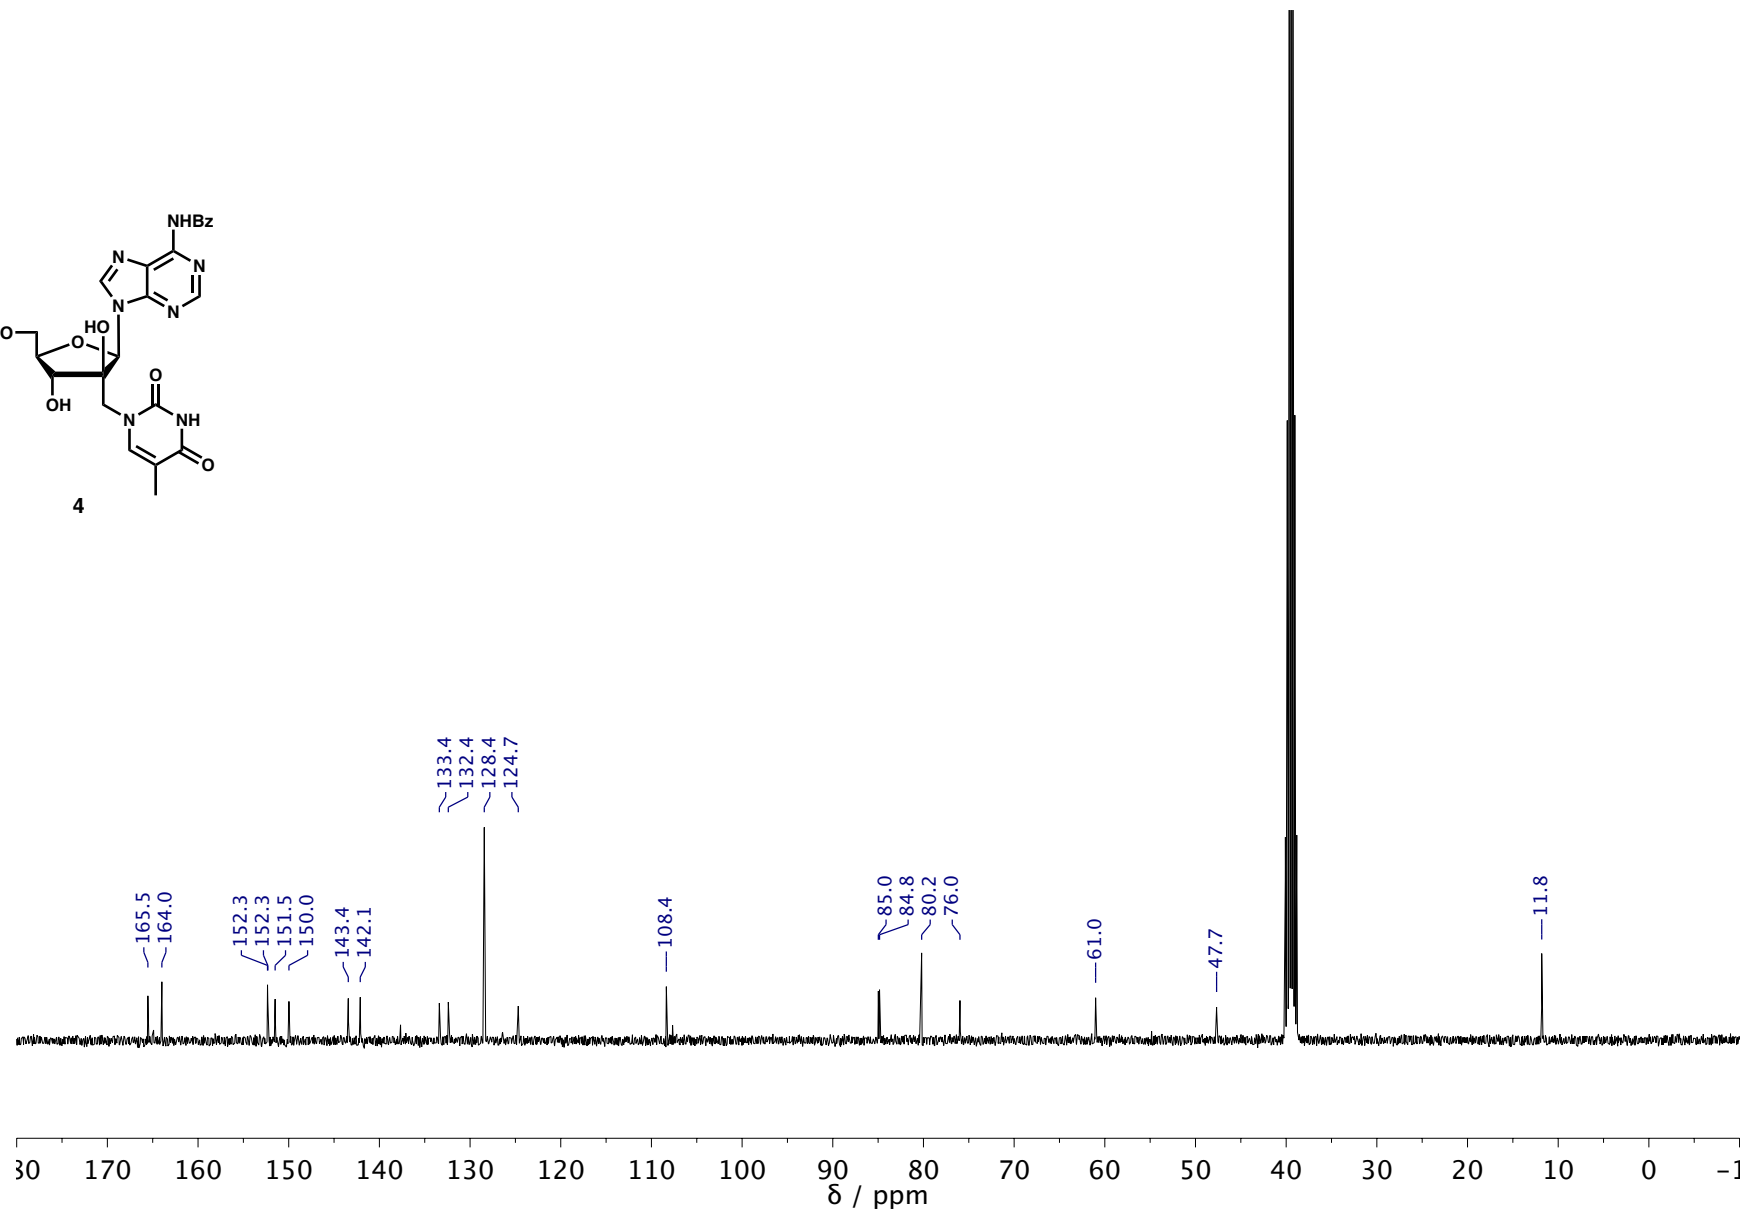

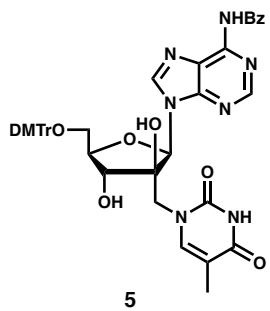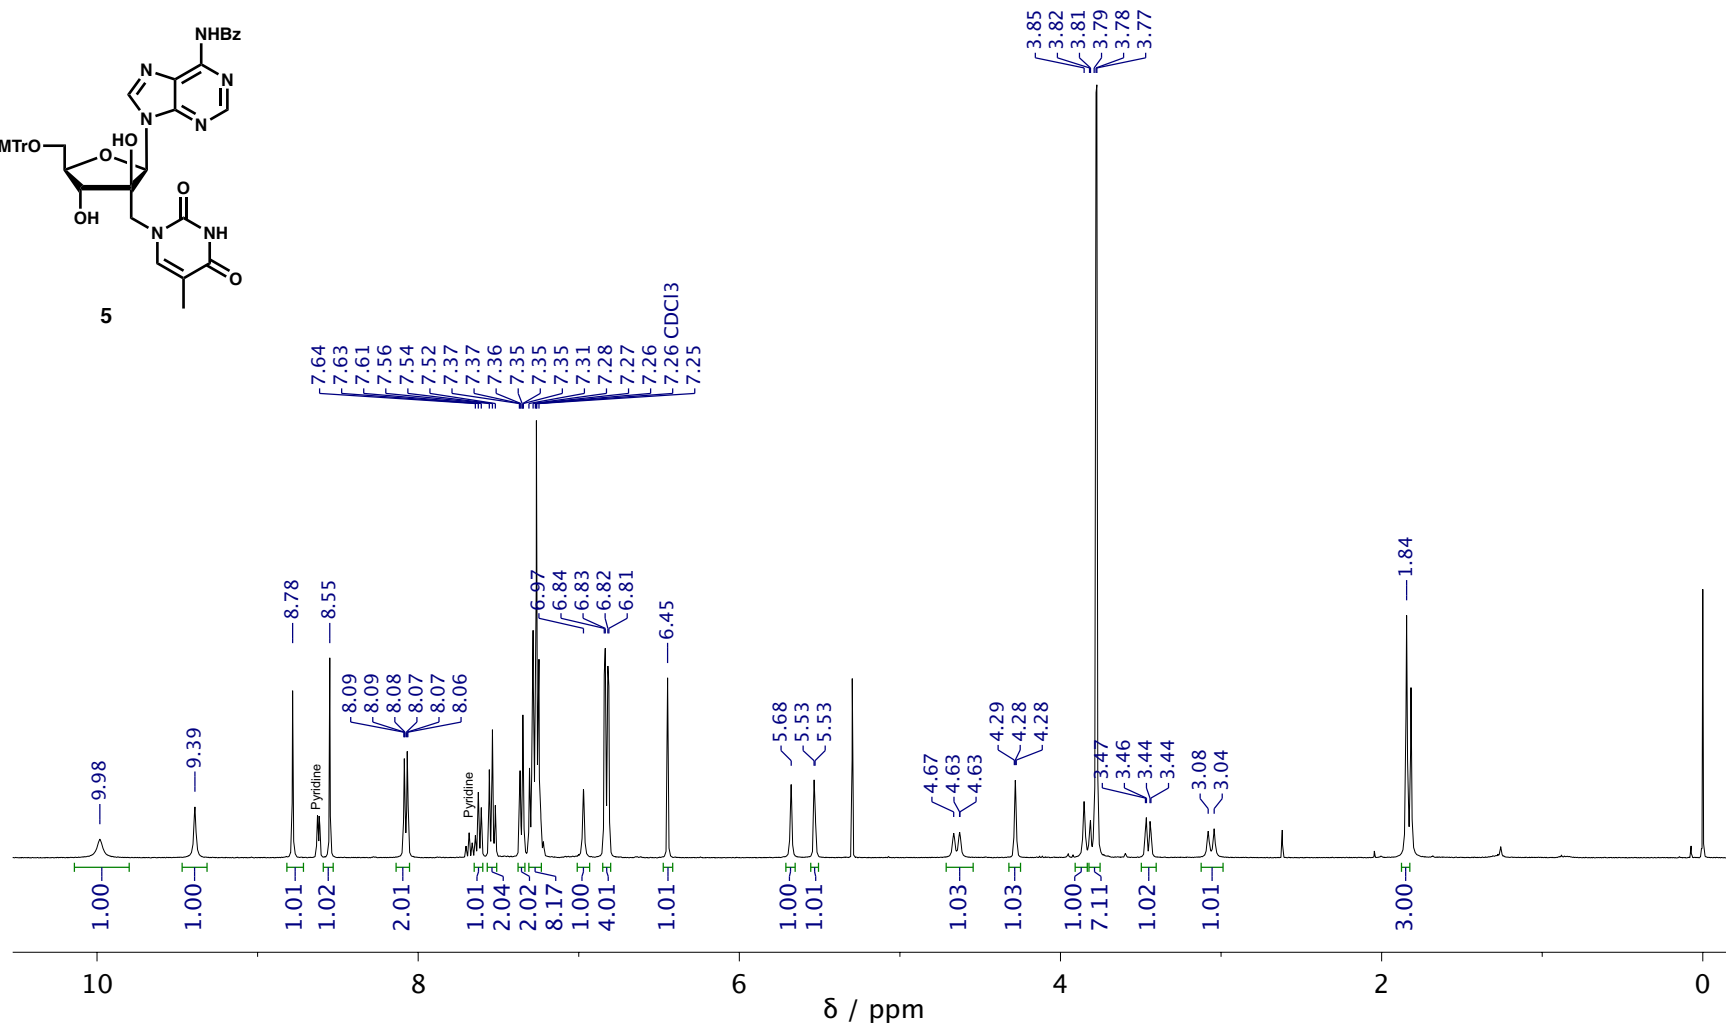

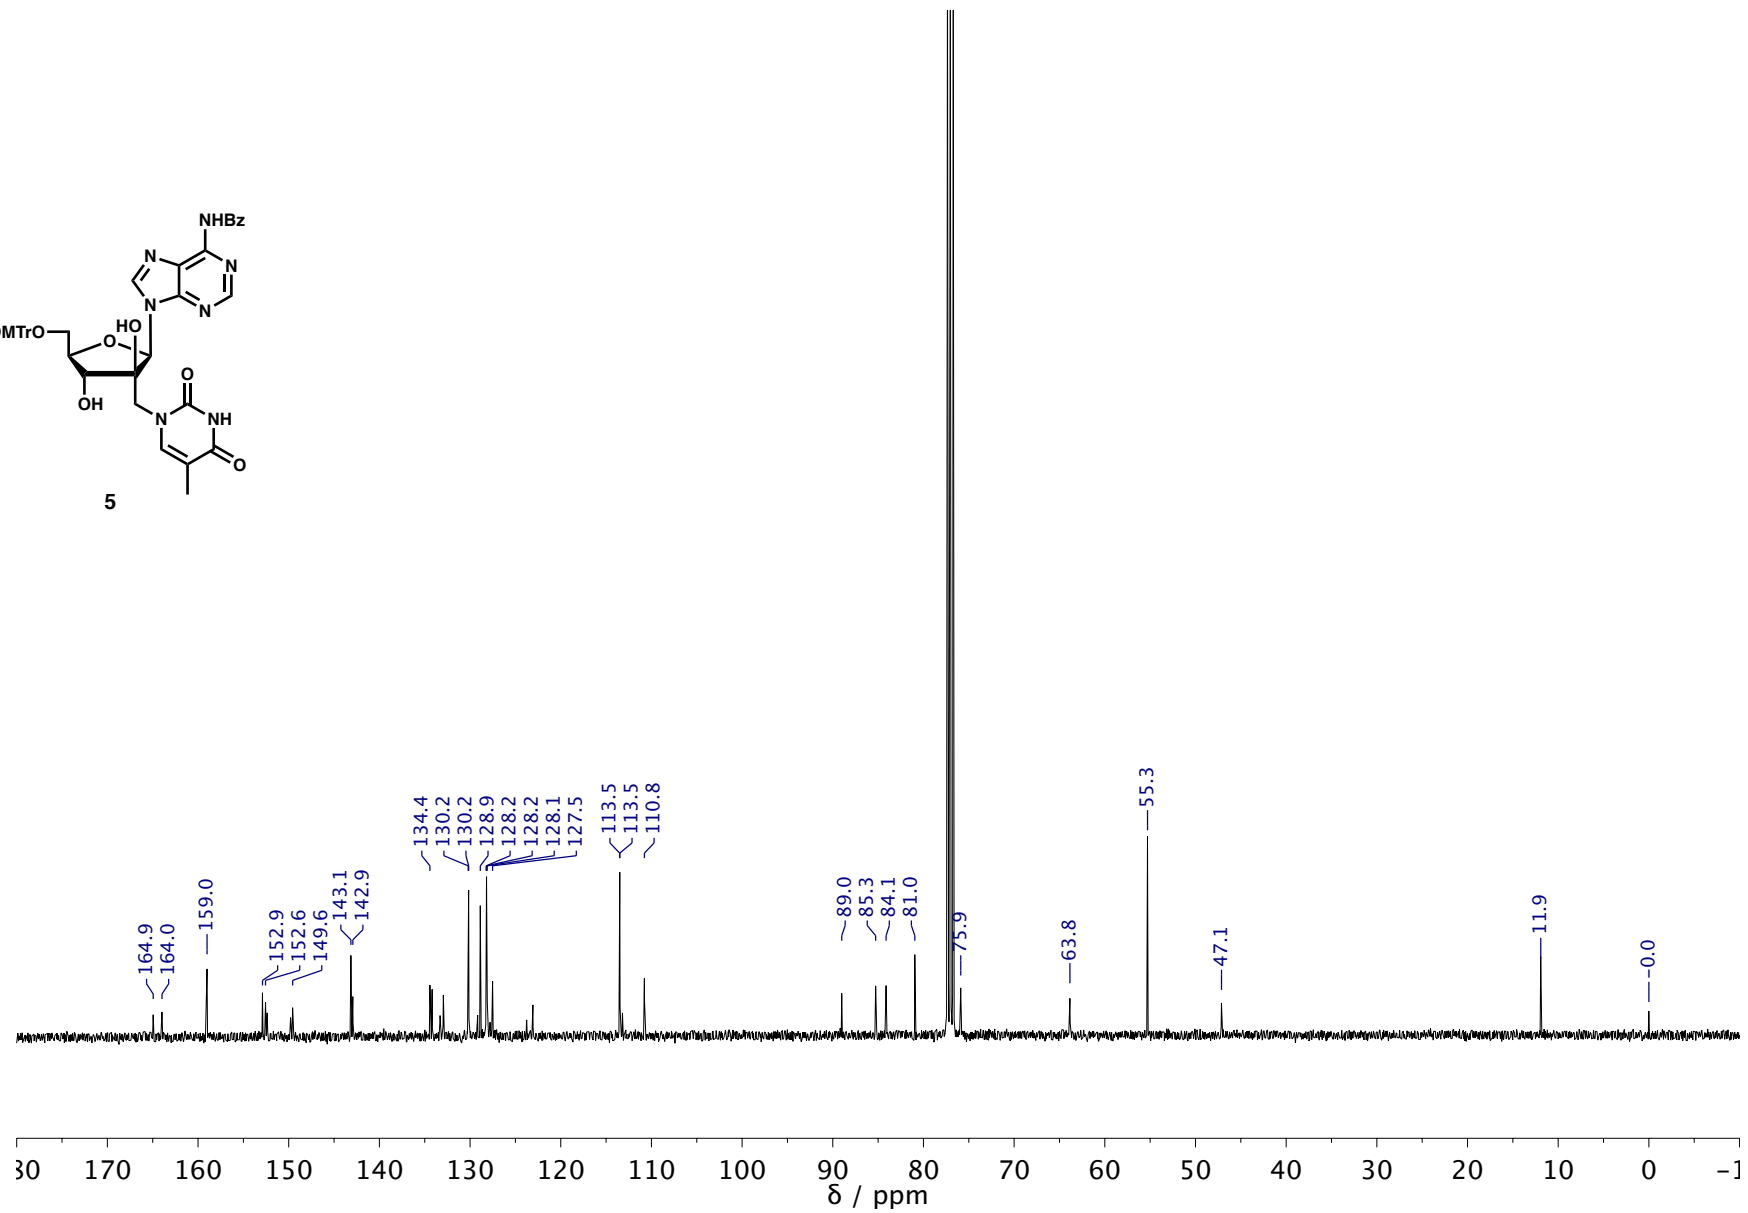

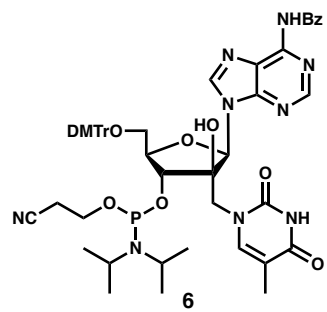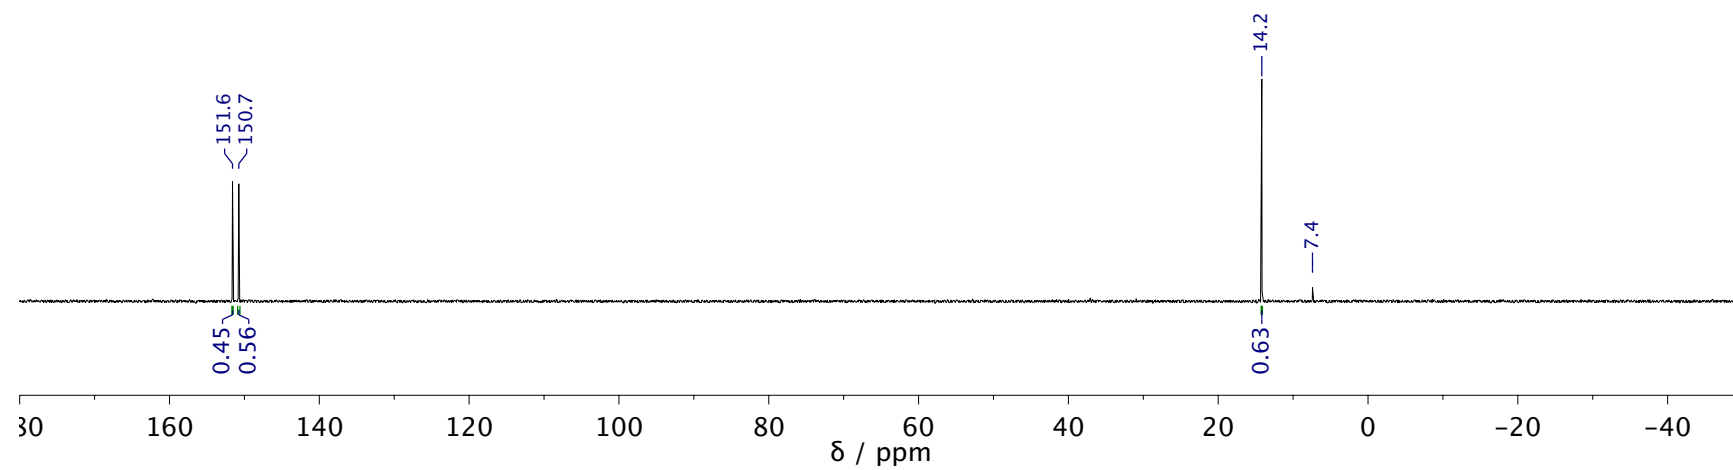

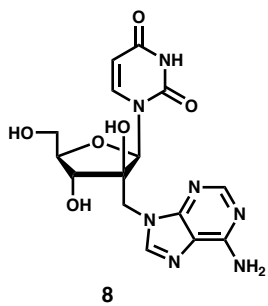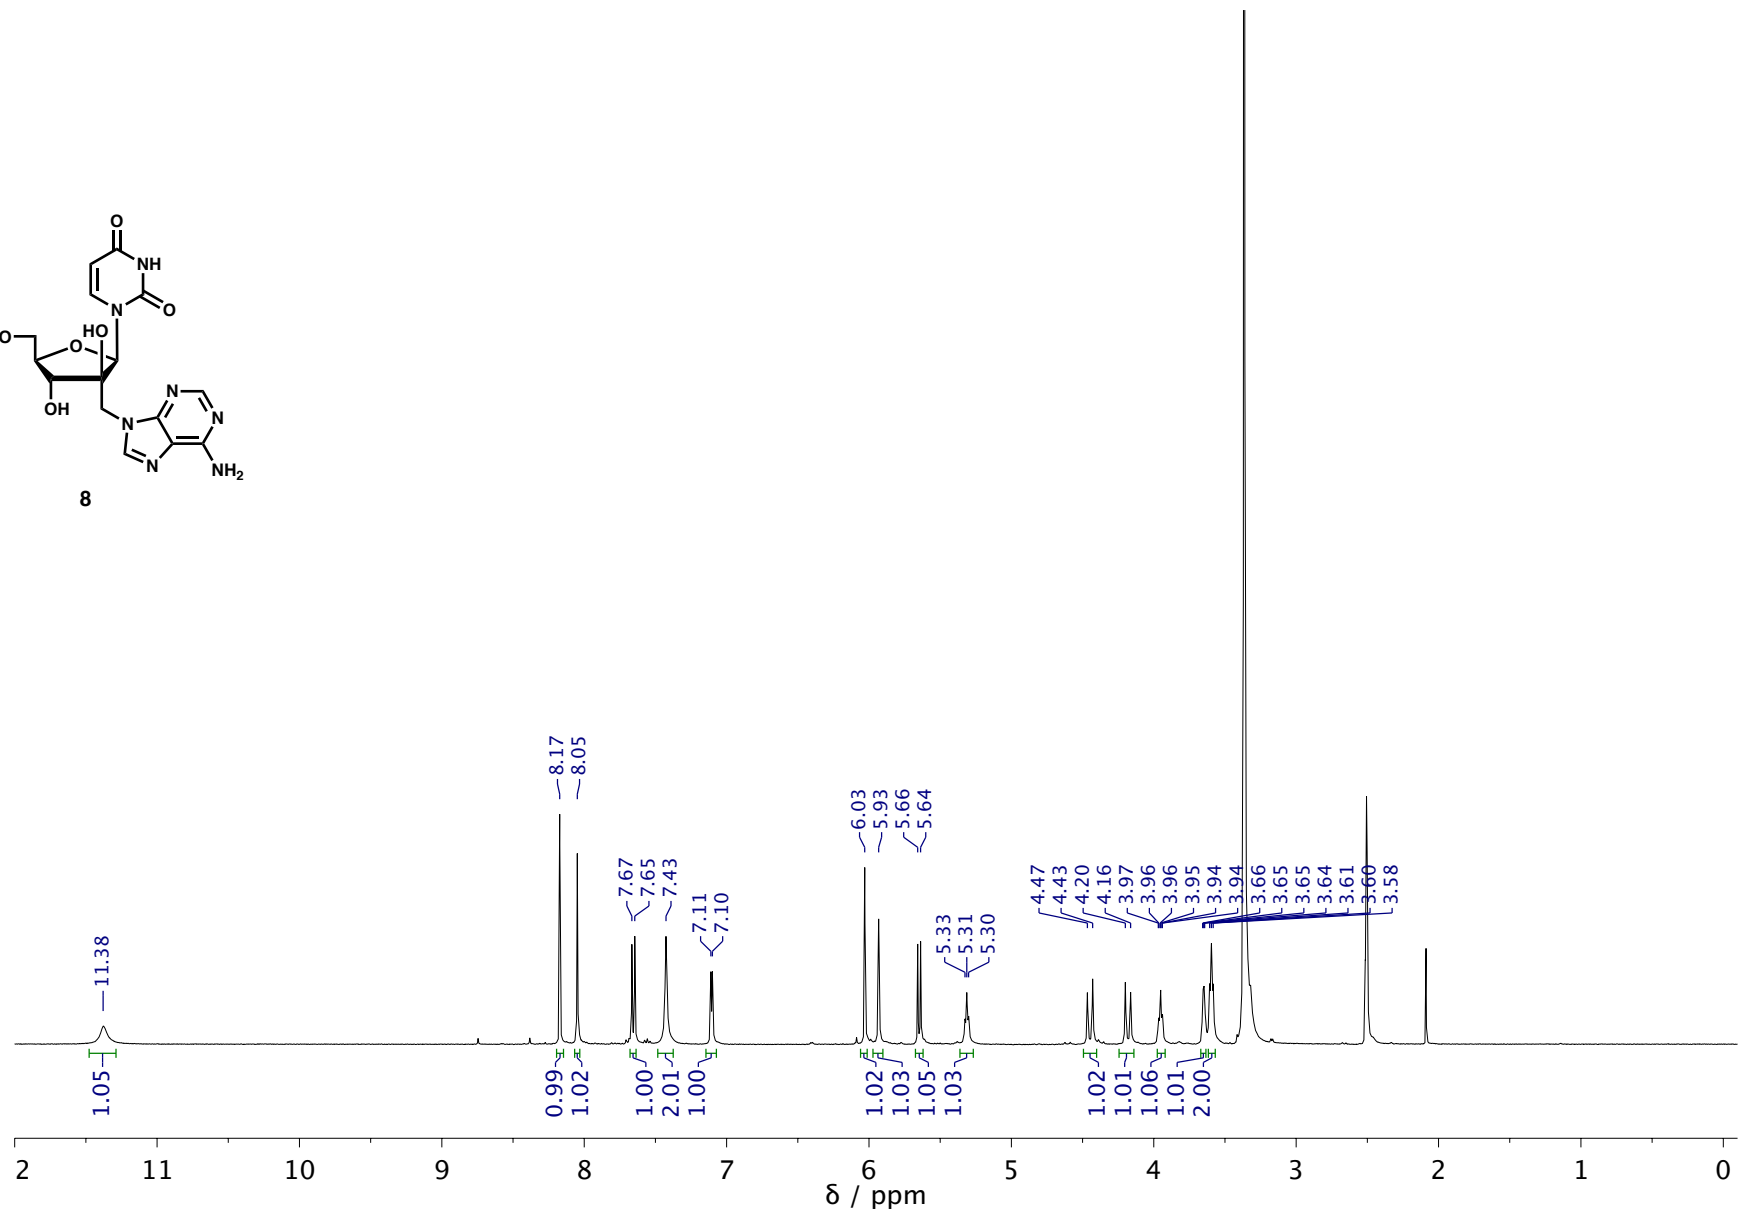

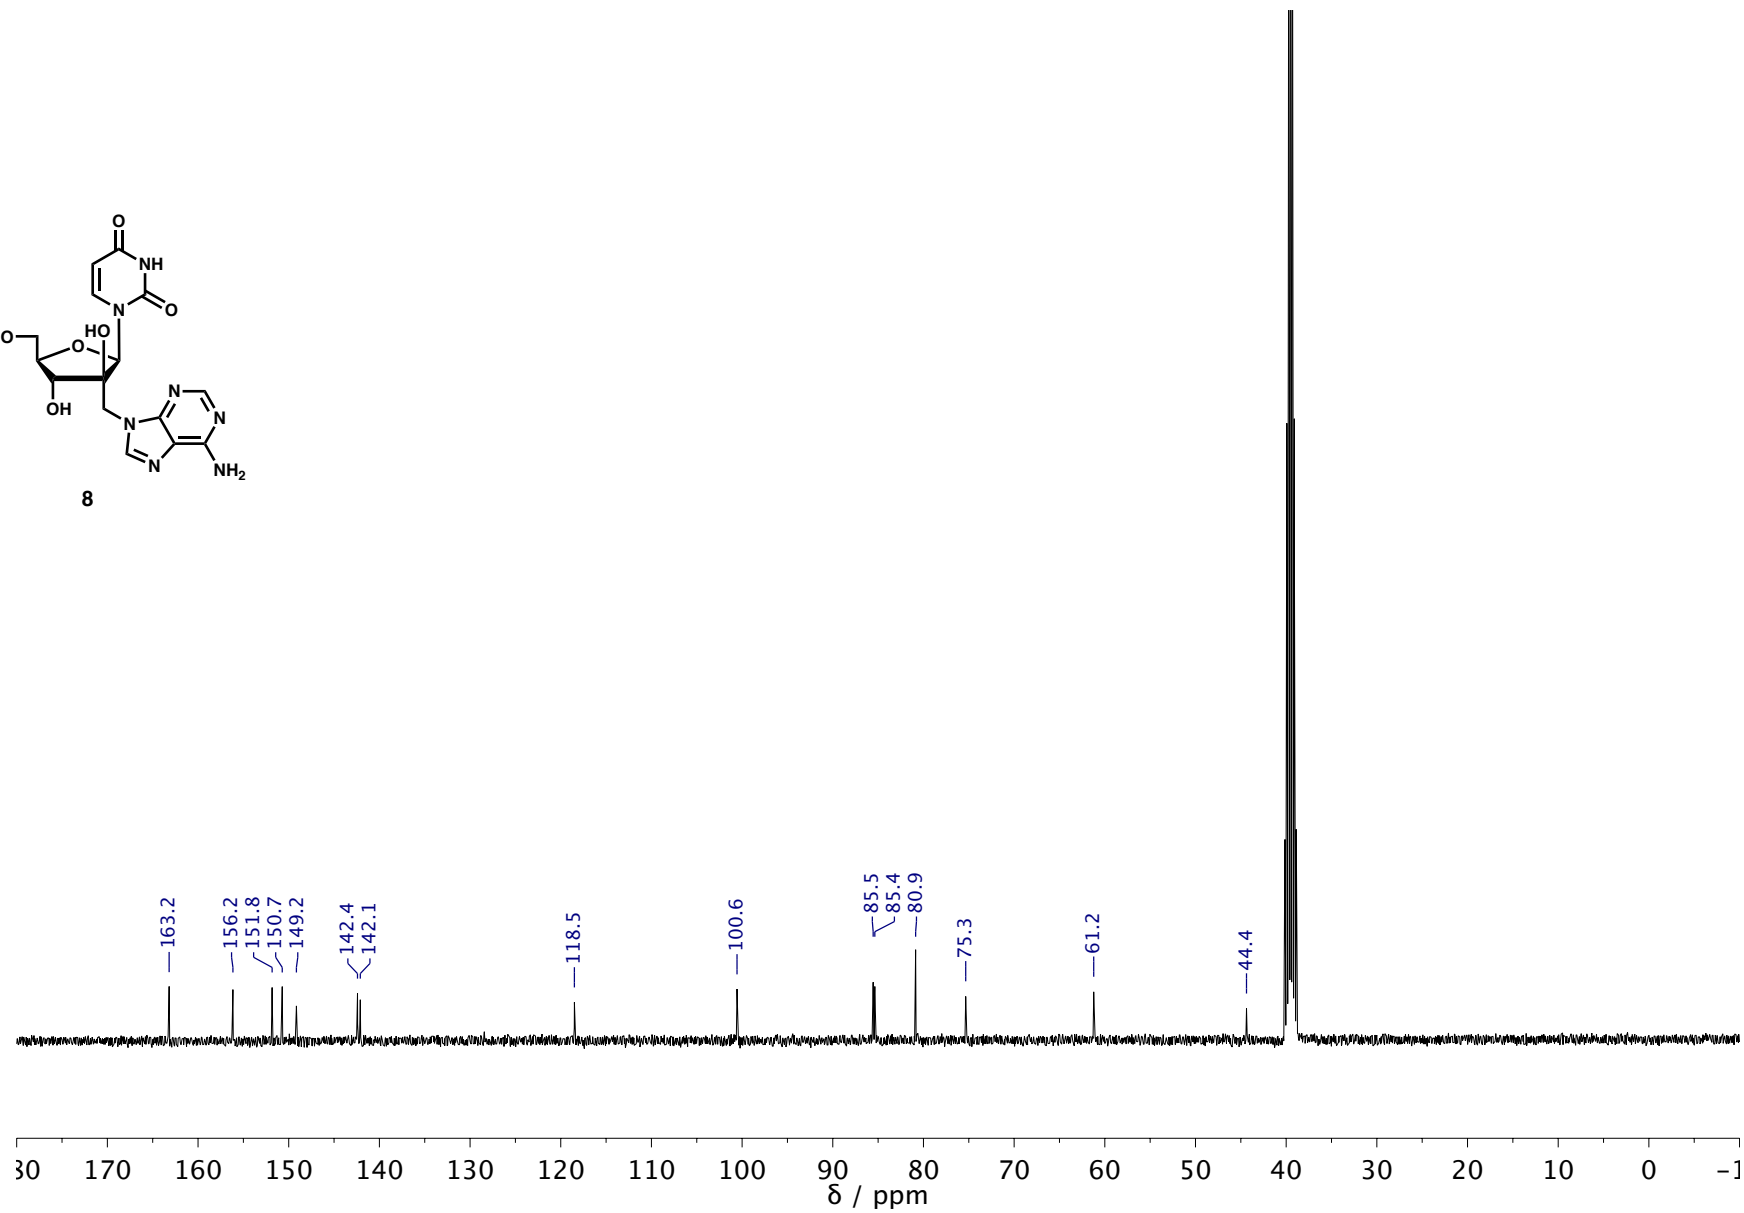



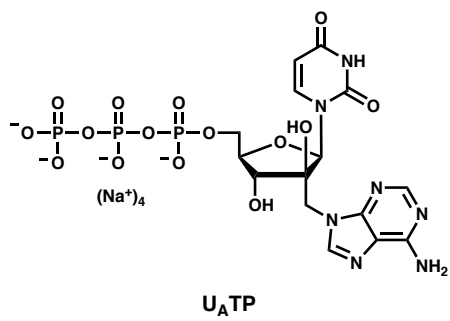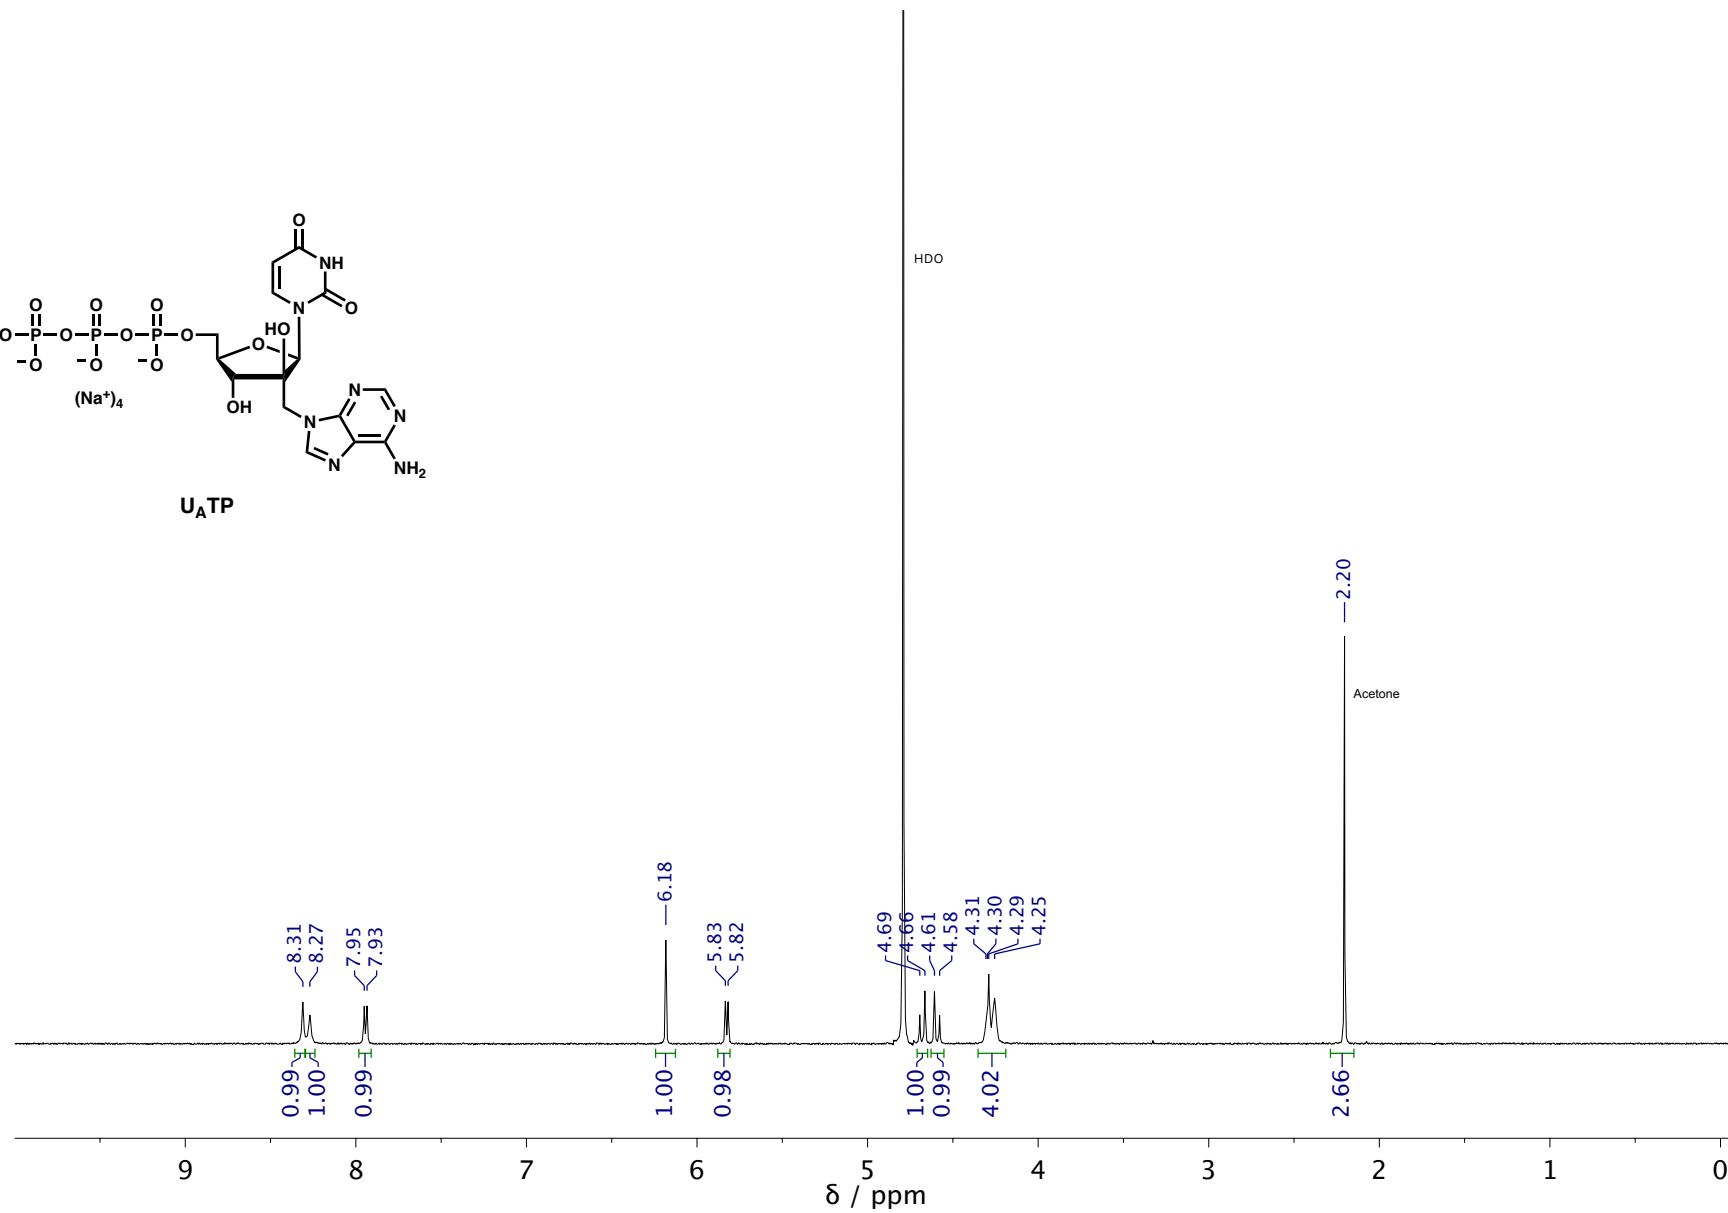

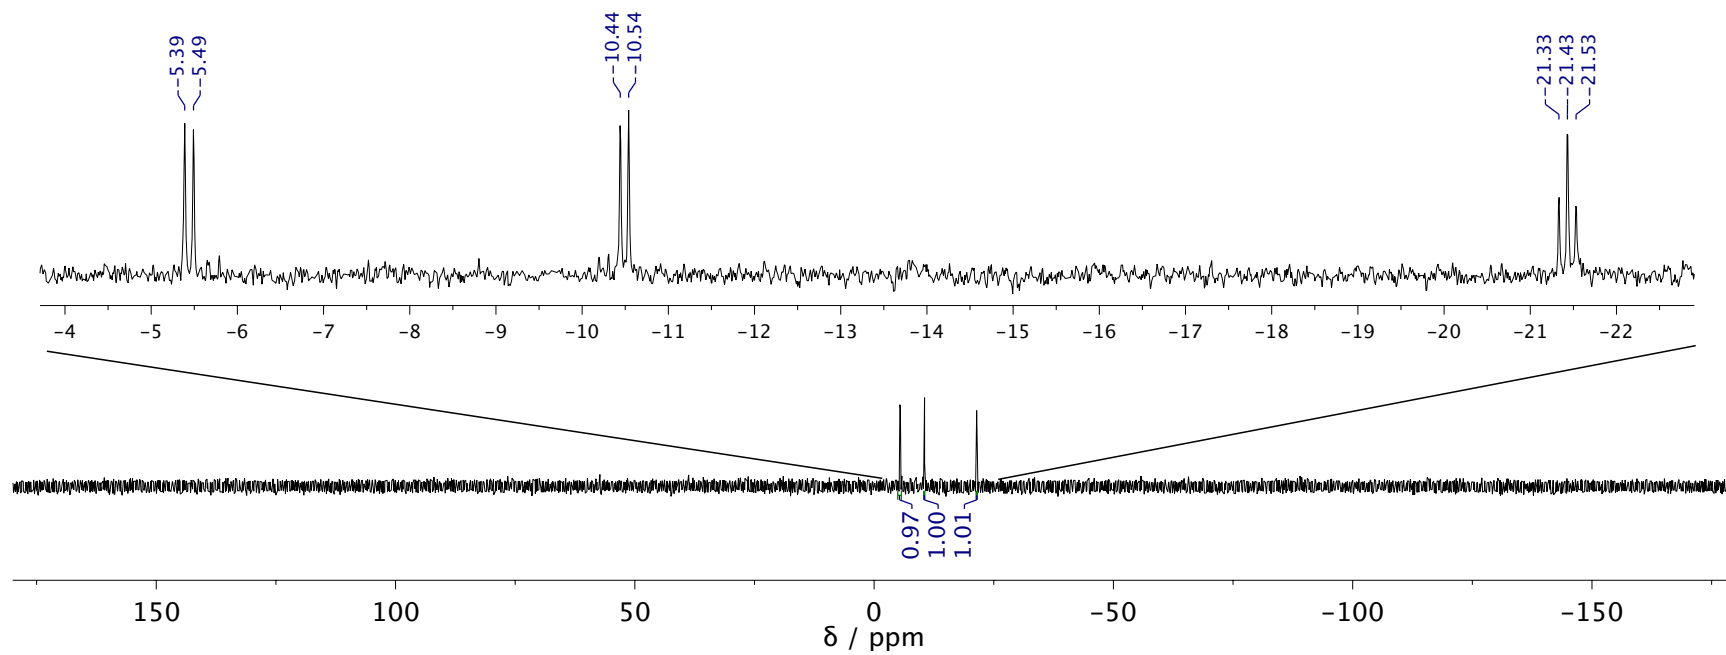

Supplement: d0ob01426e1.pdf [file d0ob01426e1.pdf]
